# Supplementary material for: BBX24 Interacts with DELLA to Regulate UV-B-Induced Photomorphogenesis in Arabidopsis thaliana
Source: MDPI journal article supplement (doi:10.3390/ijms23137386), 2022-07-02
Supplement: s1 [file s1]

**Supplementary data**

**Figure S1.** Detection of *rga-24 gai-t6* double mutant genotype level. The letter ‘M’ indicated Maker, 1~17 indicate the number of double mutant.

**Figure S2.** Identification of *rga-24 bbx24* homozygous double mutant A. Detection of *rga-24 bbx24* double mutant genotype level. The letter ‘M’ indicated Maker, 1~3 indicate the number of double mutant. B. Detection of *rga-24 bbx24* double mutant gene expression levels. The Actin2 gene was as an internal control Table S1. Primers used for genotyping.

**Table S1.** Primers used for genotyping and qRT-PCR.

**Table S2.** Primers used for plasmid constructs.

**Supplemental Data**

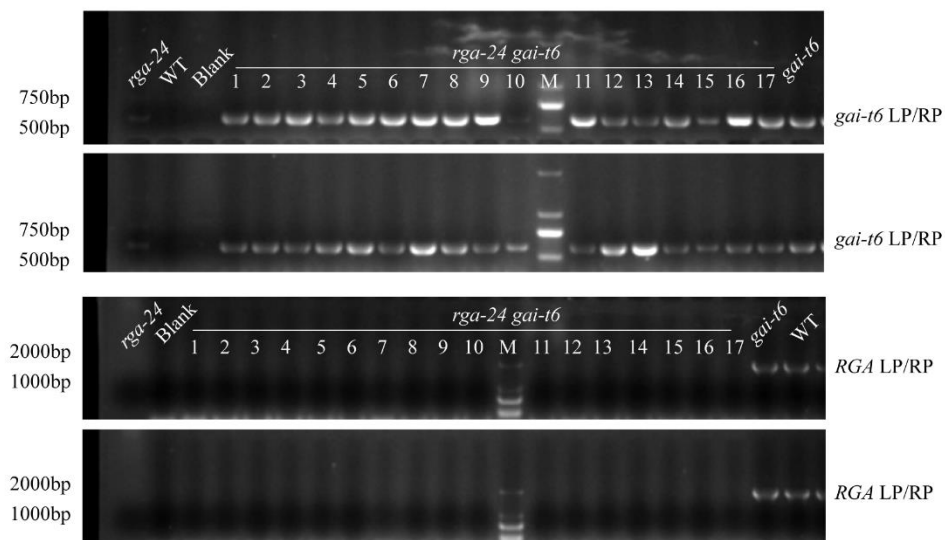

**Supplemental Figure S1** Detection of *rga-24 gai-t6* double mutant genotype level. The letter ‘M’ indicated Maker, 1~17 indicate the number of double mutant.

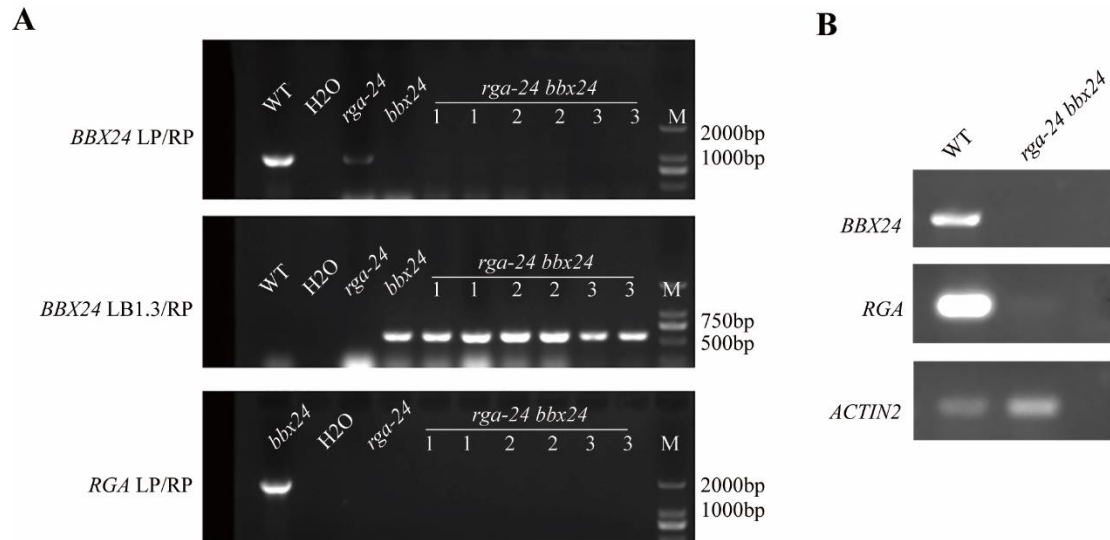

**Supplemental Figure S2** Identification of *rga-24 bbx24* homozygous double mutant A. Detection of *rga-24 bbx24* double mutant genotype level. The letter ‘M’ indicated Maker, 1~3 indicate the number of double mutant. B. Detection of *rga-24 bbx24* double mutant gene expression levels. The *Actin2* gene was as an internal control.

**Supplemental Table S1**

| Gene      | Primers       | Sequences of primers(5′ → 3′)                         |
|-----------|---------------|-------------------------------------------------------|
| At1g06040 | <i>bbx24</i>  | GACGAGAGGAAGAAGGAGAGC<br>TGAAAGAAATCGTCAACAGCC        |
| —         | <i>LB1.3</i>  | ATTTTGCCGATTTTCGGAAC<br>TTCACATAGAGAAGTCACATGTTCC     |
| At2g01570 | <i>RGA</i>    | GTCTTGGTCCGAACATATGTCAT<br>TTCACATAGAGAAGTCACATGTTCC  |
| At1g14920 | <i>gai-t6</i> | TCGGTACGGGATTTTCGCA<br>CAAGGTTATCGTGTGGAGGAGAG        |
| At2g01570 | <i>RGA</i>    | CAAGCGGAGGTGGTAATGAGTG<br>CTATGCTCACCGACCTTAATCCT     |
| At1g14920 | <i>GAI</i>    | TGGTTAGACGAAGAAGCCGAAT<br>TTGCGATATCTGCCAAGAGAAGGC    |
| At1g06040 | <i>BBX24</i>  | TTCATCGCAGTCCCTGCAAAGC<br>CCATCAAGCAGCGAGAGGTCATCAA   |
| At5g11260 | <i>HY5</i>    | CGCCGATCCAGATTCTCTACCGGAA<br>ACGTCACGTGTTGAGCGAGTATGG |
| At5g13930 | <i>CHS</i>    | GAGGAACGCTGTGCAAGACGACTG<br>ATACAGGGAGGTGAATGAA       |
| At5g08640 | <i>FLS</i>    | ACACGGCGGATAATAGTT<br>ATCGAATGAATCGTCAAGCATGAG        |
| At5g54060 | <i>UF3GT</i>  | TGAGGGATAGAGATGGTGTGGAAAG<br>GCTCTTCAGGAGCAATACGAAG   |
| At3g18780 | <i>ACTIN2</i> | GTTGGGATGAACCAGAAGGA                                  |

**Supplemental Table S2**

---

|                     |        |              |                                                                                          |
|---------------------|--------|--------------|------------------------------------------------------------------------------------------|
| Y2H<br>construction | Vector | <i>RGA</i>   | CAGTGAATTCCACCCGATGAAGAGAGATCATCACCA<br>TATCGATGCCCACCCTCAGTACGCCGCCGTCGAGAGT            |
|                     |        | <i>BBX24</i> | CAGTGAATTCCACCCGATGAAGATACAGTGTGATGT<br>TATCGATGCCCACCCTTAGCCAAGATCAGGGACAA              |
|                     |        | <i>HY5</i>   | CAGTGAATTCCACCCGATGCAGGAACAAGCGACTAGC<br>TATCGATGCCCACCCTCAAAGGCTTGCATCAGCAT             |
|                     |        | <i>RGA</i>   | CCCAGGCCTACTAGTGGATCCATGAAGATACAGTGTGATGTG<br>ACCCTCGAGGTCGACGGATCCTTAGCCAAGATCAGGGACAAT |
|                     |        | <i>BBX24</i> | TGGCGCGCCACTAGTGGATCCATGCAGGAACAAGCGACTAGC<br>GACAGTACTATCGATGGATCCAAGGCTTGCATCAGCATTAGA |
|                     |        | <i>HY5</i>   | TGGCGCGCCACTAGTGGATCCATGCAGGAACAAGCGACTAGC<br>GACAGTACTATCGATGGATCCAAGGCTTGCATCAGCATTAGA |

---
